# Supplementary material
Source: PubMed Central journal article supplement (PMC3429658)
Supplement: NIHMS398335-supplement-MolMicrobioSupplementary.pdf [file NIHMS398335-supplement-MolMicrobioSupplementary.pdf]

1 **SUPPORTING INFORMATION**

2  
3 **A Complex LuxR-LuxI Type Quorum Sensing Network in a Roseobacterial Marine**  
4 **Sponge Symbiont Activates Flagellar Motility and Inhibits Biofilm Formation**

5  
6 Jindong Zan<sup>1\*</sup>, Elisha M. Cicirelli<sup>2a\*</sup>, Naglaa M. Mohamed<sup>1</sup>, Hiruy Sibhatu<sup>3b</sup>, Stephanie  
7 Kroll<sup>2c</sup>, Ohkee Choi<sup>2d</sup>, Charis L. Uhlson<sup>3</sup>, Christina L. Wysoczinski<sup>3</sup>, Robert C. Murphy<sup>3</sup>,  
8 Mair E.A. Churchill<sup>3</sup>, Russell T. Hill<sup>1</sup> and Clay Fuqua<sup>2†</sup>

9  
10 <sup>1</sup> Insitute of Marine and Environmental Technology, University of Maryland Center for  
11 Environmental Science, 701 E Pratt St. Baltimore, Maryland 21202, USA.

12 <sup>2</sup> Department of Biology, 1001 E. 3rd St., Jordan Hall 142, Indiana University,  
13 Bloomington, IN 47405, USA.

14 <sup>3</sup>Department of Pharmacology, University of Colorado Denver, School of Medicine,  
15 12801 East 17th Avenue, Aurora, CO 80045-0511, USA

16  
17 † For correspondence:

18 Clay Fuqua, Dept. Biol., 1001 E. 3rd St., Jordan Hall 142, Indiana Univ., Bloomington,  
19 IN 47405-1847. Tel: 812-856-6005, FAX: 812-855-6705, E-mail: cfuqua@indiana.edu

## SUPPLEMENTARY METHODS

1  
2 **TLC profiling of AHLs.** Five ml MB 2216 cultures from KLH11 were grown to an OD<sub>600</sub>  
3 of 1.5 – 2.0, followed by extraction with an equal volume of dichloromethane. Culture  
4 pH was monitored and was within the range of 7.6±0.2 at the time of harvesting (sterile  
5 Marine Broth 2216 is pH 7.6). Following centrifugation, the organic phase was removed  
6 and allowed to evaporate in a fume hood. Extracts were concentrated 1000 fold and  
7 normalized to an OD<sub>600</sub> of 1.5 and resuspended in a final volume of approximately 5 µl  
8 of acidified (0.01%) ethyl acetate and loaded onto a C18 RP-TLC plate (Mallinckrodt  
9 Baker, Phillipsburg, NJ, USA). TLC plates were developed in a 60% methanol water  
10 mobile phase, dried, and overlaid with 100 ml of 0.6% ATGN media supplemented with  
11 40 µg ml<sup>-1</sup> X-gal and 1 ml of an OD<sub>600</sub> = 12.0 suspension of the highly sensitive *A.*  
12 *tumefaciens* AHL reporter (*A. tumefaciens* KYC55 [pJZ372][pJZ384][pJZ410]) as  
13 previously described (Zhu *et al.*, 2003). TLC plate overlays were placed in a sealed  
14 container and incubated at 28°C for 16-48 hrs.

15  
16 **Derivatization of AHL samples.** The formation of the methoxylamine derivatives of the  
17 AHL samples (MC4100 expressing Ssal or Ssbl) was carried out using 0.5 ml of  
18 methoxylamine HCL (1.2 M) sodium acetate trihydrate (200 mM) in 87.5% methanol  
19 and 12.5% distilled H<sub>2</sub>O followed by 1 h incubation at 37°C, then diluted with 2 ml H<sub>2</sub>O.  
20 This diluted reaction solution was passed through a pre-activated C18 reversed solid  
21 phase extraction cartridge. The sample was eluted with 1 ml methanol, taken to  
22 dryness and resuspended in 30 ul of 95% solvent A 5% solvent B and analyzed as

1 positive ions by LC/MS. The methoxylated AHLs were found to elute approximately 3  
2 min later than un-derivatized AHLs and had a molecular weight increase by 29 u. The  
3 trimethylsilylation of the equivalent AHL samples was carried out by adding equal parts  
4 of bis(trimethylsilyl)trifluoroacetamide and acetonitrile to a dried aliquot of the sample for  
5 a total volume of 50  $\mu$ l, followed by incubating at 60°C 1 h in a capped culture tube. The  
6 reacted product was taken to dryness and resuspended in 30  $\mu$ l of 95% solvent A 5%  
7 solvent B and analyzed as positive ions using the same LC/MS/MS conditions.  
8 Trimethylsilylated derivatives were retained on the column 5.2 min later than un-  
9 derivatized AHLs and had a molecular weight increase by 72 u.

10

11 **Immunoblotting with anti-flagellar antibodies.** Samples were separated by 15%  
12 SDS-PAGE at 100V 80-90 min, and transferred to the membrane (Osmonics,  
13 Westborough, MA) at 30V for 40 min using a semi-dry electrotransfer system. The  
14 membrane was blocked overnight at 4°C in Blotto (1x TBS-T [Tris Buffered Saline], 1%  
15 Tween 20) and 5% dried milk). The polyclonal antibody was diluted 1:20,000 in 4 ml of  
16 Blotto and incubated with the membrane for 45 min on a rocking shaker at room  
17 temperature. The membrane was then washed three times for 5 min in 1X TBS-T.  
18 Secondary antibody solution at 1:20,000 in 4 ml of Blotto was incubated with the  
19 membrane and rocked 45 min at room temp. The blot was rinsed three times for 5 min  
20 with 1X TBS-T, followed by 2 times in 1X TBS. Chemoluminescent substrate,  
21 Supersignal West Pico Chemoluminescent Substrate (Pierce, Rockford, IL) was used  
22 as the detection reagent. Equal parts of the Luminol/Enhancer and Stable Peroxide  
23 Buffer were combined and pooled on top of the membrane for ~5 min. Excess detection

- 1 reagent was removed by blotting on filter paper, and signal was detected by exposure to
- 2 Kodak BioMax film (Kodak).

SUPPLEMENTARY TABLES

**Supplementary Table 1. Cross-regulation experiments for SsaR and SsbR in an AHL<sup>-</sup> host<sup>1</sup>**

| Expression plasmid                   | Fusion plasmid            | $\beta$ -Galactosidase Sp. Act. <sup>2</sup> |                    |
|--------------------------------------|---------------------------|----------------------------------------------|--------------------|
|                                      |                           | No AHL                                       | + AHL <sup>3</sup> |
| Vector (pBBR1-MCS5)                  | <i>ssbl-lacZ</i> (pEC121) | 0.7 (0.1)                                    | 0.8 (0.1)          |
| <i>P<sub>lac</sub>-ssaR</i> (pEC112) | <i>ssbl-lacZ</i> (pEC121) | 0.9 (0.1)                                    | 0.9 (0.2)          |
| Vector (pBBR1-MCS5)                  | <i>ssal-lacZ</i> (pEC116) | 57.9 (0.9)                                   | 58.5 (3.6)         |
| <i>P<sub>lac</sub>-ssbR</i> (pEC123) | <i>ssal-lacZ</i> (pEC116) | 50.6 (3.1)                                   | 44.3 (2.8)         |

<sup>1</sup> All strains derived from Ti-plasmidless *A. tumefaciens* NTL4

<sup>2</sup> Specific activity in Miller Units, averages of assays in triplicate (standard deviation)

<sup>3</sup> 2  $\mu$ M 3-oxo-C16:1  $\Delta$ 11-HSL was added for *P<sub>lac</sub>-ssaR* and 20  $\mu$ M 3-OH-C14-HSL was added for *P<sub>lac</sub>-ssbR*.

1 **Supplementary Table S2. Relevant Strains and Plasmids**

2

| <b>Bacteria/Plasmid</b>                | <b>Relevant feature<sup>b</sup></b>                                           | <b>Reference</b>                                     |
|----------------------------------------|-------------------------------------------------------------------------------|------------------------------------------------------|
| <i>E. coli</i> Electro-Ten Blue        | Standard alpha-complementation strain                                         | Stratagene                                           |
| <i>E. coli</i> DH5α/λpir               | Strain for propagating R6K suicide plasmids                                   | Lab collection                                       |
| <i>E. coli</i> S17-1/λpir              | IncP conjugal donor                                                           | (Kalogeraki and Winans, 1997)                        |
| <i>E. coli</i> XL-1 Blue               | Standard alpha-complementation strain                                         | Lab collection                                       |
| <i>E. coli</i> TOP 10 F'               | Standard alpha-complementation strain, <i>lacI<sup>Q</sup></i>                | Qiagen                                               |
| <i>E. coli</i> MC4100                  | K-12 derivative, Δ <i>lacZ</i>                                                | (Casadaban, 1976)                                    |
| <i>A. tumefaciens</i> NTL4             | Ti plasmidless derivative, nopaline chromosomal background                    | (Zhu <i>et al.</i> , 1998)                           |
| <i>A. tumefaciens</i> KYC55            | Ti plasmidless derivative, octopine chromosomal background                    | (Cho <i>et al.</i> , 1997; Zhu <i>et al.</i> , 2003) |
| <i>Ruegeria pomeroyi</i> DSS-3         | wild type                                                                     | (Gonzales <i>et al.</i> , 2003)                      |
| KLH11                                  | wild type                                                                     | (Mohamed <i>et al.</i> , 2008)                       |
| KLH11-EC1                              | Rif <sup>R</sup>                                                              | This study                                           |
| KLH11-EC2                              | <i>ssal-lacZ</i> , null <i>ssal</i> , Rif <sup>R</sup> , Km <sup>R</sup>      | This study                                           |
| KLH11-SK01                             | Δ <i>ssal</i> , Rif <sup>R</sup>                                              | This study                                           |
| KLH11-EC3                              | <i>ssbl-lacZ</i> , null <i>ssbl</i> , Rif <sup>R</sup> , Km <sup>R</sup>      | This study                                           |
| KLH11-SK02                             | Δ <i>ssal</i> Δ <i>ssbl</i> Rif <sup>R</sup>                                  | This study                                           |
| KLH11-EC4                              | <i>ssaR-lacZ</i> , null <i>ssaR</i> , Rif <sup>R</sup> , Km <sup>R</sup>      | This study                                           |
| KLH11-EC5                              | <i>ssbR-lacZ</i> , null <i>ssbR</i> Rif <sup>R</sup> , Km <sup>R</sup>        | This study                                           |
| KLH11-JZ1                              | <i>ssaR-lacZ</i> , wild type <i>ssaR</i> , Rif <sup>R</sup> , Km <sup>R</sup> | This study                                           |
| KLH11-JZ2                              | <i>ssbR-lacZ</i> , wild type <i>ssbR</i> , Rif <sup>R</sup> , Km <sup>R</sup> | This study                                           |
| pCR <sup>®</sup> 2.1-TOPO <sup>®</sup> | PCR fragment cloning vector, Ap/Km <sup>R</sup>                               | Invitrogen                                           |

|                          |                                                                                                                           |                               |
|--------------------------|---------------------------------------------------------------------------------------------------------------------------|-------------------------------|
| pBBR1-MCS2               | $P_{lac}$ expression vector, Km <sup>R</sup>                                                                              | (Kovach <i>et al.</i> , 1995) |
| pBBR1-MCS5               | $P_{lac}$ expression vector, Gm <sup>R</sup>                                                                              | (Kovach <i>et al.</i> , 1995) |
| pGEM <sup>®</sup> T-Easy | PCR fragment cloning vector, Ap <sup>R</sup>                                                                              | Promega                       |
| pVIK112                  | R6K-based <i>lacZ</i> transcriptional fusion, integration vector, Km <sup>R</sup>                                         | (Kalogeraki and Winans, 1997) |
| pRA301                   | <i>lacZ</i> translational fusion vector                                                                                   | (Akakura and Winans, 2002)    |
| pJZ372                   | $P_{traI-lacZ}$ translation fusion, Tet <sup>R</sup>                                                                      | (Zhu <i>et al.</i> , 2003)    |
| pJZ384                   | $P_{T7::traR}$ , Sp <sup>R</sup>                                                                                          | (Zhu <i>et al.</i> , 2003)    |
| pJZ410                   | T7 polymerase expressing plasmid                                                                                          | (Zhu <i>et al.</i> , 2003)    |
| pECH100                  | pBBR1-MCS5 derivative, 3 kb <i>HinD</i> III fragment containing <i>ssaI</i> and truncated <i>ssaR</i> , Gm <sup>R</sup>   | This study                    |
| pECH101                  | pBBR1-MCS5 derivative, 2.8 kb <i>HinD</i> III fragment containing <i>ssbI</i> and truncated <i>ssbR</i> , Gm <sup>R</sup> | This study                    |
| pECS102                  | pBBR1-MCS5 derivative, 3.2 kb <i>Sal</i> I fragment containing <i>ssaI</i> and <i>ssaR</i> , Gm <sup>R</sup>              | This study                    |
| pEC103                   | pGEM <sup>®</sup> T-Easy derivative, carrying truncated <i>ssaI</i> fragment, Ap <sup>R</sup>                             | This study                    |
| pEC104                   | pGEM <sup>®</sup> T-Easy derivative, carrying truncated <i>ssbI</i> fragment, Ap <sup>R</sup>                             | This study                    |
| pEC105                   | pGEM <sup>®</sup> T-Easy derivative, carrying truncated <i>ssaR</i> fragment, Ap <sup>R</sup>                             | This study                    |
| pEC106                   | pGEM <sup>®</sup> T-Easy derivative, carrying full length PCR-amplified <i>ssbR</i> fragment, Ap <sup>R</sup>             | This study                    |
| pEC107                   | pVIK112 derivative carrying truncated <i>ssaR</i> gene from pEC105, Km <sup>R</sup>                                       | This study                    |

|        |                                                                                                                          |            |
|--------|--------------------------------------------------------------------------------------------------------------------------|------------|
| pEC108 | pBBR1-MCS5 derivative carrying full length $P_{lac-ssal}$ , from pEC111, Gm <sup>R</sup>                                 | This study |
| pEC109 | pBBR1-MCS5 derivation carrying full length $P_{lac-ssbl}$ , from pEC110, Gm <sup>R</sup>                                 | This study |
| pEC110 | pCR <sup>®</sup> 2.1-TOPO <sup>®</sup> derivative carrying full length PCR-amplified $P_{lac-ssbl}$ , Ap/Km <sup>R</sup> | This study |
| pEC111 | pCR <sup>®</sup> 2.1-TOPO <sup>®</sup> derivative carrying full length PCR-amplified $P_{lac-ssal}$ , Ap/Km <sup>R</sup> | This study |
| pEC112 | pBBR1-MCS5 derivative, carrying full length $P_{lac-ssaR}$ , from pEC106, Gm <sup>R</sup>                                | This study |
| pEC113 | pVIK112 derivation carrying truncated $ssal$ gene from pEC103, Km <sup>R</sup>                                           | This study |
| pEC114 | pCR <sup>®</sup> 2.1-TOPO <sup>®</sup> derivative, carrying PCR amplified $P_{ssal}$ , Ap/Km <sup>R</sup>                | This study |
| pEC115 | pVIK112 derivative carrying truncated $ssbl$ gene from pEC104, Km <sup>R</sup>                                           | This study |
| pEC116 | pRA301 derivation, $P_{ssal-lacZ}$ , Sp <sup>R</sup>                                                                     | This study |
| pEC117 | pGEM <sup>®</sup> T-Easy derivative, carrying $P_{ssbR}$ and $ssbR$ Ap <sup>R</sup>                                      | This study |
| pEC118 | pGEM <sup>®</sup> T-Easy derivative, carrying $P_{ssbl}$ and $ssbl$ Ap <sup>R</sup>                                      | This study |
| pEC119 | pGEM <sup>®</sup> T-Easy derivative, carrying $P_{ssbR}$ and $ssbR$ , Ap <sup>R</sup>                                    | This study |
| pEC120 | pGEM <sup>®</sup> T-Easy derivative, carrying full length $P_{lac-ssbR}$ , Ap <sup>R</sup>                               | This study |
| pEC121 | pRA301 derivative, $P_{ssbl-lacZ}$ , Sp/Sm <sup>R</sup>                                                                  | This study |
| pEC122 | pVIK112 derivative carrying truncated $ssbR$ from pEC119, Km <sup>R</sup>                                                | This study |
| pEC123 | pBBR1-MCS5 derivative, carrying full length $P_{lac-ssbR}$ , from pEC120, Gm <sup>R</sup>                                | This study |



|        |                                                                                                                                   |            |
|--------|-----------------------------------------------------------------------------------------------------------------------------------|------------|
| pEC124 | pRA301 derivative, <i>P<sub>ssaI</sub>-lacZ</i> , 5' promoter deletion, 79 bp with <i>lux</i> type box, Sp <sup>R</sup>           | This study |
| pEC127 | pRA301 derivative, <i>P<sub>ssaI</sub>-lacZ</i> , 5' promoter deletion, 63 bp fragment lacks <i>lux</i> type box, Sp <sup>R</sup> | This study |
| pJZ001 | pVIK112 derivative, <i>ssaR</i> gene with 5' truncation, to retain wt <i>ssaR</i> , Km <sup>R</sup>                               | This study |
| pJZ002 | pVIK112 derivative, <i>ssbR</i> gene with 5' truncation, to retain wt <i>ssbR</i> , Km <sup>R</sup>                               | This study |
|        |                                                                                                                                   |            |

- 1 <sup>b</sup> Ap = Ampicillin, Gm=Gentamycin, Km=Kanamycin, Rif=Rifampicin, Sp=Spectinomycin.
- 2 Tc=Tetracycline
- 3

**Supplementary Table S3. Primers used in this study.**

| <b>Primer name</b> | <b>Sequence<sup>a</sup> (5'-3')</b>                        | <b>Restriction Enzyme</b> |
|--------------------|------------------------------------------------------------|---------------------------|
| ssal D1            | <u>ACTAGTCTATGGTGACGACTGGAAG</u>                           | SpeI                      |
| ssal D2            | <u>GAATTCGTCAGTCAGTCA</u> GTTTCCCGTAATATTGGCTT             | NA                        |
| ssal D3            | <u>TGACTGACTGACGAATTC</u> AGGCTGGCGAACTCAAGCCTG            | NA                        |
| ssal D4            | <u>GCATGCGACTACATTGTCGAGCTG</u>                            | SphI                      |
| ssbl D1            | <u>ACTAGTGCAATCAGGGTTATTGATC</u>                           | SpeI                      |
| ssbl D2            | <u>GAATTCGTCAGTCAGTCA</u> GTCACAACATGATTGTTCCCCTTGT        | NA                        |
| ssbl D3            | <u>TGACTGACTGACGAATTC</u> GCCTGACCTTGGTGGAAATTG            | NA                        |
| ssbl D4            | <u>GCATGCGATACGGTGAATGGTCGTTGC</u>                         | SphI                      |
| ssal 1             | cgg <u>GAATTC</u> ATGTTCGAACTGCGCGCTCGGG                   | EcoRI                     |
| ssal 2             | gcc <u>GGTACC</u> ATCGCAGGGACCTTGCCCATC                    | KpnI                      |
| ssal 3             | ggc <u>CTCGAGCTGAAACAGGAAACAGCTATG</u> ATTTTGGTAGTTGATG    | XhoI                      |
| ssal 4             | ggc <u>GAATTCGGGTC</u> AGGCCTCATGAGCAAAGC                  | EcoRI                     |
| ssaR 1             | cgc <u>GAATTC</u> TACGACCCTCCCCGAACAGG                     | EcoRI                     |
| ssaR 2             | cgc <u>GGTACCCGGCCCAT</u> TGCAAATCTC                       | KpnI                      |
| ssaR 3             | ggg <u>CTCGAGGTGAAACAGGAAACAGCTATG</u> GATATTGTTGATCTCAGC  | XhoI                      |
| ssaR 4             | ggg <u>GAATTCGGCTTAACCTGGGTAGATTAGCCC</u>                  | EcoRI                     |
| ssbl 1             | cgc <u>GAATTCGGATGAGCTGCATAAATTTCCGG</u>                   | EcoRI                     |
| ssbl 2             | gcc <u>GGTACCAACGGAATCCGGTCTCGCCCG</u> )                   | KpnI                      |
| ssbl 3             | ggc <u>CTCGAGCTGAAACAGGAAACAGCTATG</u> TTGCGTTATTTATATGCGG | XhoI                      |
| ssbl 4             | ggc <u>GAATTCGGGTC</u> AGGCGGAAAGCGCAAACCG                 | EcoRI                     |
| ssbR 1             | ggc <u>GAATTC</u> TCCGGTTCAGCTGCGCGATCGG                   | EcoRI                     |
| ssbR 2             | cgc <u>GGTACCTTCCGGTTGCCGGTTCTGGGC</u>                     | KpnI                      |
| ssbR 3             | gcg <u>CTCGAGGTGAAACAGGAAAcagctATGAGGCTT</u> GCGCGCCCGCG   | XhoI                      |
| ssbR 4             | ggg <u>GAATTCGGCTTAACGACTATTAATCCTCTGC</u>                 | EcoRI                     |
| fliC 1             | cgc <u>gaattc</u> AAGTCGGTCAACATGAACCTG                    | EcoRI                     |
| fliC 2             | gcc <u>ggtagc</u> GTTGTCACGATCAAGCGAGGA                    | KpnI                      |
| fliCRT1            | CGCAGAACCTGTGACCGGT                                        | NA                        |
| fliCRT2            | GGTATCGCCTGCGGCCAATGT                                      | NA                        |

|             |                                                     |       |
|-------------|-----------------------------------------------------|-------|
| flaART1     | GCACCGATGCATATGCGCAAGCT                             | NA    |
| flaART2     | TGAGCGATTGCAGCCGGGTT                                | NA    |
| rpoDRT1     | GACGCCTATCGCGGCCGT                                  | NA    |
| rpoDRT2     | GCCGACCTGCGCCATATCGT                                | NA    |
| ssal P1     | ccg <u>GAATTCT</u> GCACTAACCACACCTCAGGCCG           | EcoRI |
| ssal P2     | gcg <u>GAATTCT</u> TACGGGAAACCCCAATAGATTCTG         | EcoRI |
| ssal P3     | ggg <u>GAATTCT</u> TAGATTCTGCTGTGAAATCCGAG          | EcoRI |
| ssal P4     | ccg <u>CTGCAGAAT</u> <b>CAT</b> GTTAACCCCTTCG       | PstI  |
| ssbl P1     | cgg <u>GAATTCT</u> TATAGCCGGGCACAGGTGGCGC           | EcoRI |
| ssbl P2     | ccc <u>CTGCAGCAAC</u> <b>CAT</b> GATTGTTCCCCTTGTCGT | PstI  |
| aP1         | CGGCACCATT <b>CAT</b> GGCCATGT                      | NA    |
| aP2         | CCATT <b>CGT</b> CCCGACTGCAGC                       | NA    |
| aP3         | ATGATTTTGGTAGTTGATG                                 | NA    |
| aP4         | GTCGCATAGGACACCGAGTT                                | NA    |
| bP1         | CCAATATGGCTTCACGACCT                                | NA    |
| bP2         | AATAACCCTGATTGCCACA                                 | NA    |
| bP3         | GGTAAACGAAGATGGCGAAG                                | NA    |
| bP4         | GAGCCGATCATGCGATAAAT                                | NA    |
| ssaRintactF | <u>GAATTC</u> CAAGGCCTGCATCTGATCG                   | EcoRI |
| ssaRintactR | <u>GGTACCTT</u> AACCTGGGTAGATTAGCCC                 | KpnI  |
| ssbRintactF | <u>GAATTC</u> TATCACCGCATTGATCCGG                   | EcoRI |
| ssbRintactR | <u>GGTACCTT</u> AAACGACTATTAATCCTCTGCTG             | KpnI  |
| RtaF        | AAGTACTTGACGAAATGTT <b>CGAACTG</b>                  | NA    |
| RtaR        | GGTCGATCACGGTAATGATGTCTTC                           | NA    |

<sup>a</sup> Engineered restriction sequences are underlined. Complementary sequences for PCR-SOEing are shown in bold and are also underlined. Start and stop codons are in bold. *E. coli lacZ* ribosomal binding sites are in italics and bold.

Protection nucleotides for restriction enzyme are shown in lower case. NA= not applied.

1 **Supplementary References**

- 2
- 3 Akakura, R., and Winans, S.C. (2002) Mutations in the *occQ* operator that decrease  
4 OccR-induced DNA bending do not cause constitutive promoter activity. *J Biol Chem*  
5 **277**: 15883-15780.
- 6 Casadaban, M.J. (1976) Transposition and fusion of *lac* genes to selected promoters in  
7 *Escherichia coli* using bacteriophage lambda and Mu. *J Mol Bio* **104**: 541-555.
- 8 Cho, K., Fuqua, C., and Winans, S.C. (1997) Transcriptional regulation and locations of  
9 the *Agrobacterium tumefaciens* genes required for complete catabolism of octopine.  
10 *J bacteriol* **179**: 1-8.
- 11 Gonzales, J.Z., Covert, J.S., Whitman, W.B., Henriksen, J.R., Mayer, F., Scharf, F., *et al.*  
12 (2003) *Silicibacter pomeroyi* sp. nov. and *Roseovarius nubinhibens* sp. nov.,  
13 dimethylsulfoniopropionate-demethylating bacteria from marine environments. *Intl J*  
14 *Syst Evol Microbiol* **53**: 1261-1269.
- 15 Kalogeraki, V.S., and Winans, S.C. (1997) Suicide plasmids containing promoterless  
16 reporter genes can simultaneously disrupt and create fusions to target genes of  
17 diverse bacteria. *Gene* **188**: 69-75.
- 18 Kovach, M.E., Elzer, P.H., Hill, D.S., Robertson, G.T., Farris, M.A., Roop II, R.M., and  
19 Peterson, K.M. (1995) Four new derivatives of the broad host range cloning vector  
20 pBBR1MCS, carrying different antibiotic-resistance cassettes. *Gene* **166**: 175-176.
- 21 Mohamed, N.M., Cicirelli, E.M., Kan, J., Chen, F., Fuqua, C., and Hill, R.T. (2008)  
22 Diversity and quorum-sensing signal production of Proteobacteria associated with  
23 marine sponges. *Environ Microbiol* **10**: 75-86.
- 24 Zhu, J., Beaver, J.W., More, M.I., Fuqua, C., Eberhard, A., and Winans, S.C. (1998)  
25 Analogs of the autoinducer 3-oxooctanoyl-homoserine lactone strongly inhibit activity  
26 of the TraR protein of *Agrobacterium tumefaciens*. *J bacteriol* **180**: 5398-5405.
- 27 Zhu, J., Chai, Y., Zhong, Z., Li, S., and Winans, S.C. (2003) *Agrobacterium* bioassay  
28 strain for ultrasensitive detection of *N*-acylhomoserine lactone-type quorum-sensing  
29 molecules: detection of autoinducers in *Mesorhizobium huakuii*. *Appl Environ*  
30 *Microbiol* **69**: 6949-6953.

## SUPPLEMENTARY FIGURE LEGENDS

1  
2  
3 **Figure S1. Comparative analysis of AHLs.** The relative amounts of the known AHLs  
4 in (A and C) KLH11 derivatives and (B) *E. coli* MC4100 are shown in bar graphs, with  
5 the peak label above each set of bars. The plot shows the ratio of the area of the  
6 transition for each AHL to  $m/z$  102 to the same transition for the internal standard d3-  
7 C6-HSL. Analysis of AHL samples was performed in positive-ion mode with the third  
8 quadrupole set to monitor  $m/z$  102.3 as described in Experimental Procedures. The  
9 relative amounts of the known AHLs in each strain are shown in the bar graph, and the  
10 data were analyzed as in Figures 2 and 3. (e), (f), (g), and (h) referring to detection of  
11 3OH-C12-HSL, 3OH-C13-HSL/3OH-C14:1-HSL, 3OH-C14-HSL/3oxoC14-HSL, and  
12 3oxoC16-HSL/3OHC16:1-HSL respectively. In panels B and C, the Ssal y axis is on the  
13 left and the Ssbl y axis (with an asterisk) is on the right.

14  
15 **Figure S2. Gene maps of KLH11 *ssaR/ssaI* and *ssbR/ssbI* loci.** Arrows represent  
16 genes. A) SsaR (ZP\_05123091) and SsaI (ZP\_05123801) and are predicted to be 233  
17 and 284 amino acids, respectively; Genbank accession numbers are ZP\_05124568 for  
18 transglycosylase and ZP\_05123238 for trigger factor. Primers used to test whether  
19 *ssaRI* are in the same operon are indicated as P1, P2, P3 and P4 (see Table S3, aP1,  
20 aP2, aP3, aP4). Lanes 1-4 were PCR results using primers P1 and P2, lanes 5-8 used  
21 primers P3 and P4, and lanes 9-12 used primers P1 and P4. Lanes 1, 5 and 9 used  
22 cDNA as template, lanes 2, 6 and 10 used genomic DNA as template, lanes 3, 7 and 10  
23 used RNA as templates. Lanes 4, 8 and 12 were negative controls the primer sets. B)

1 SsbR (ZP\_05123460) and Ssbl (ZP\_05121795) are predicted to be 239 and 212 amino  
2 acids. ; Genbank accession numbers are ZP\_05124465 for crotonyl CoA reductase and  
3 ZP\_05122236 for helicase. Primers used to test whether ssbRI are in the same operon  
4 are indicated as P1, P2, P3 and P4 (see Table S3, primers bP1, bP2, bP3, bP4). The  
5 lanes are organized the same as in panel A.

6  
7 **Figure S3. Sequence alignment of selected AHL synthases.** The grey shaded  
8 regions are the most conserved sequence blocks within the AHL synthase family.  
9 Residues are colored red to indicate acidic or hydrophilic, blue for basic, and orange for  
10 other. Shaded residues are absolutely conserved and the boxed residues are the most  
11 similar regions within the family.

12  
13 **Figure S4. Mass spectrometric analysis of plasmid-expressed Sscl-directed AHLs**  
14 **from E. coli.** Cultures of E. coli MC4100 expressing plasmid-borne sscl were extracted  
15 and subjected to reverse-phase chromatographic separation prior to tandem MS  
16 analysis using the precursor ion-scanning mode (transitions were monitored for  
17 precursor  $[M + H]^+ \rightarrow m/z 102$ ) for (A) MC4100 + Sscl. The peaks in the  
18 chromatograms are labeled with lettering and the AHLs are noted. (B) The relative  
19 amounts of the known AHLs in E. coli MC4100 derivatives harboring Plac expression  
20 plasmids with Ssal, Ssbl, and Sscl are shown in bar graphs, with the peak label above  
21 each set of bars. The plot shows the ratio of the area of the transition for each AHL to  
22  $m/z 102$  to the same transition for the internal standard D3-C6-HSL. The Ssbl/Sscl y  
23 axis is on the left, and the Ssal y axis is on the right.

1

2 **Figure S5. Activation of *ssaI* in response to synthetic AHLs** (A) Activation of *ssaI*-  
3 *lacZ* fusion with synthetic long chain AHLs. KLH11 *ssaI*- carrying the integrated *ssaI*-  
4 *lacZ* fusion. The final concentration of 3-OH-C14 used was 20  $\mu$ M and the other 3  
5 AHLs were 2  $\mu$ M (B) Dose responsive activation of *ssaI-lacZ* by SsaR ( $P_{lac}$ -*ssaR*) in *A.*  
6 *tumefaciens* NTL4 background. Different concentrations of the crude organic extract of  
7 KLH11 cultures (% v/v) and 3-oxo-C16:1  $\Delta$ 11 (nM) were added at the time of culture  
8 inoculation. Miller Units are averages of assays performed in triplicate and error bars  
9 are standard deviations.

10

11 **Figure S6. Growth curves of KLH11 and different QS mutants.** Average OD600 of 5  
12 ml cultures in MB2216. Cultures were grown in triplicate.

13

14 **Figure S7. Flagellar staining of KLH11 quorum-sensing mutants.** Stained cells  
15 from late stage cultures were viewed under phase contrast microscopy with 100X lens.  
16 Wild type (EC1), *ssaI*- (EC2), *ssbI*- (EC3), *ssaR*- (EC4), and *ssbR*- (EC5). Red arrows  
17 indicate stained flagella.

Zan et al.,  
Supplementary  
Figure 1

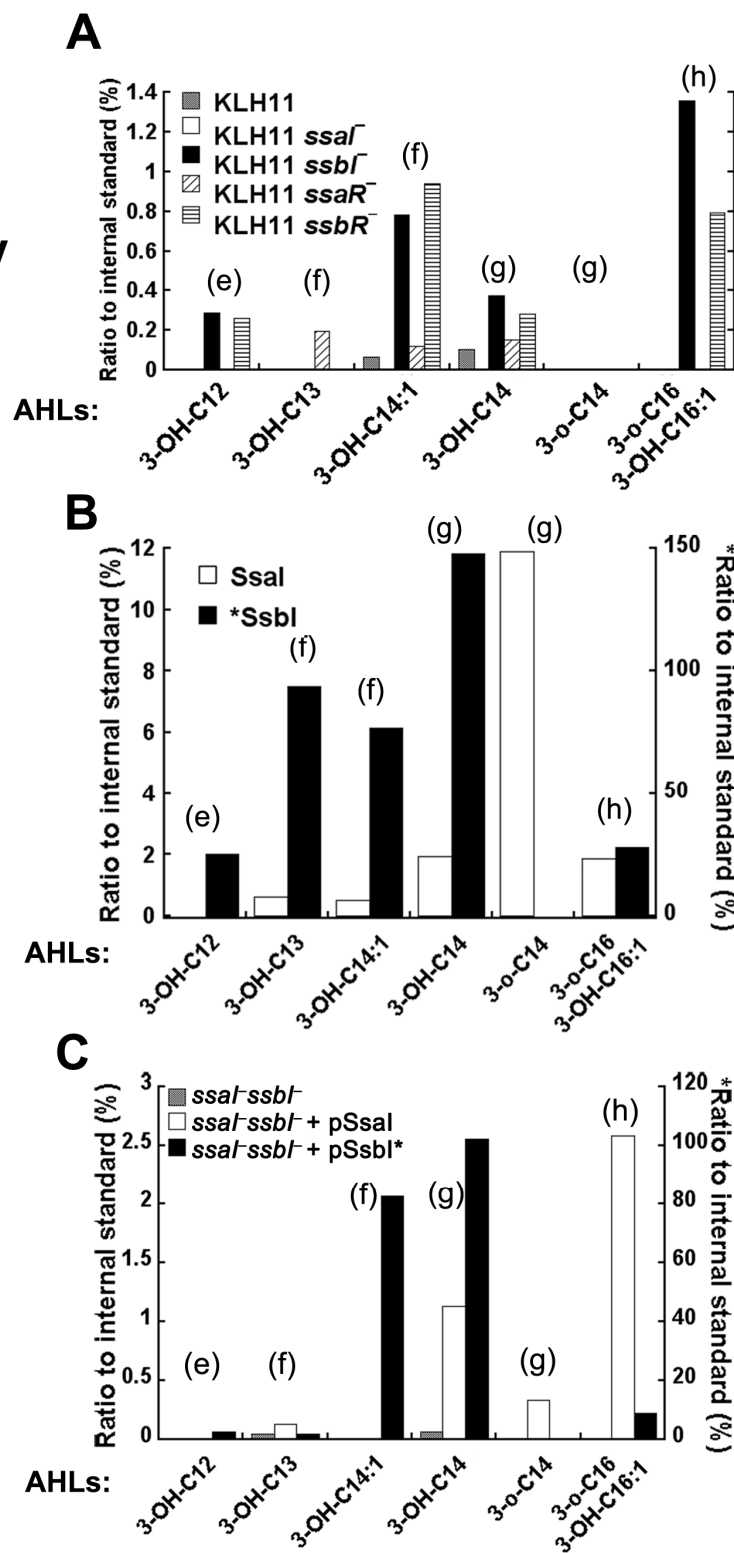

**Figure S1.** Comparative analysis of AHLs. The relative amounts of the known AHLs in (A and C) KLH11 derivatives and (B) *E. coli* MC4100 are shown in bar graphs, with the peak label above each set of bars. The plot shows the ratio of the area of the transition for each AHL to *m/z* 102 to the same transition for the internal standard d3-C6-HSL. Analysis of AHL samples was performed in positive-ion mode with the third quadrupole set to monitor *m/z* 102.3 as described in Experimental Procedures. The relative amounts of the known AHLs in each strain are shown in the bar graph, and the data were analyzed as in Figures 2 and 3. (e), (f), (g), and (h) referring to detection of 3OH-C12-HSL, 3OH-C13-HSL/3OH-C14:1-HSL, 3OH-C14-HSL/3oxoC14-HSL, and 3oxoC16-HSL/3OHC16:1-HSL respectively. In panels B and C, the *SsaI* y axis is on the left and the *SsbI* y axis (with an asterisk) is on the right.



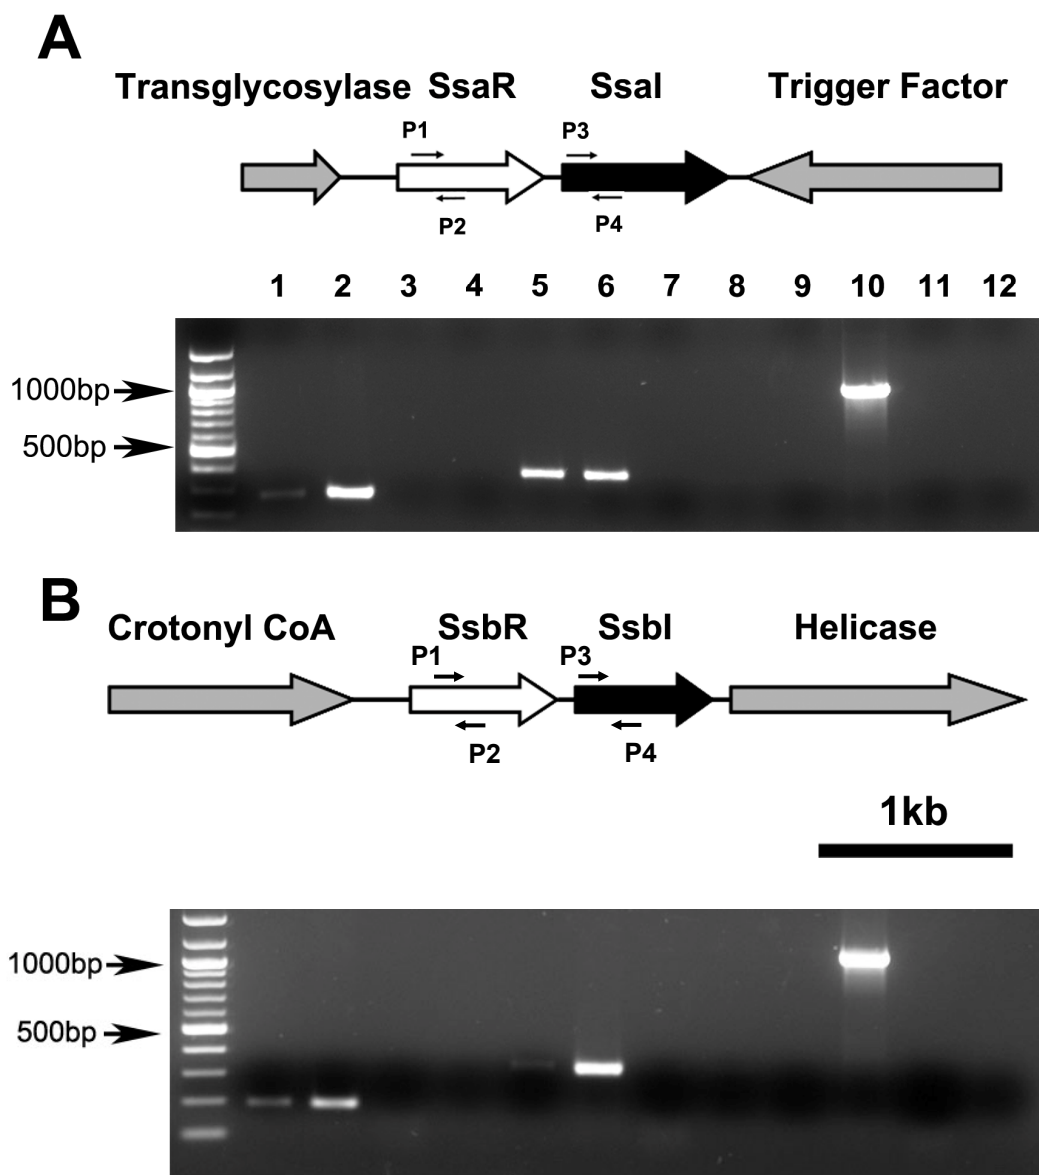

**Figure S2.** Gene maps of KLH11 *ssaR/ssaI* and *ssbR/ssbI* loci. Arrows represent genes.

A) *SsaR* (ZP\_05123091) and *SsaI* (ZP\_05123801) are predicted to be 233 and 284 amino acids, respectively; Genbank accession numbers are ZP\_05124568 for transglycosylase and ZP\_05123238 for trigger factor. Primers used to test whether *ssaR/I* are in the same operon are indicated as P1, P2, P3 and P4 (see Table S3, aP1, aP2, aP3, aP4). Lanes 1-4 were PCR results using primers P1 and P2, lanes 5-8 used primers P3 and P4, and lanes 9-12 used primers P1 and P4. Lanes 1, 5 and 9 used cDNA as template, lanes 2, 6 and 10 used genomic DNA as template, lanes 3, 7 and 10 used RNA as templates. Lanes 4, 8 and 12 were negative controls the primer sets.

B) *SsbR* (ZP\_05123460) *SsbI* (ZP\_05121795) are predicted to be 239 and 212 amino acids. ; Genbank accession numbers are ZP\_05124465 for crotonyl CoA reductase and ZP\_05122236 for helicase. Primers used to test whether *ssbR/I* are in the same operon are indicated as P1, P2, P3 and P4 (see Table S3, primers bP1, bP2, bP3, bP4). The lanes are organized the same as in panel A.

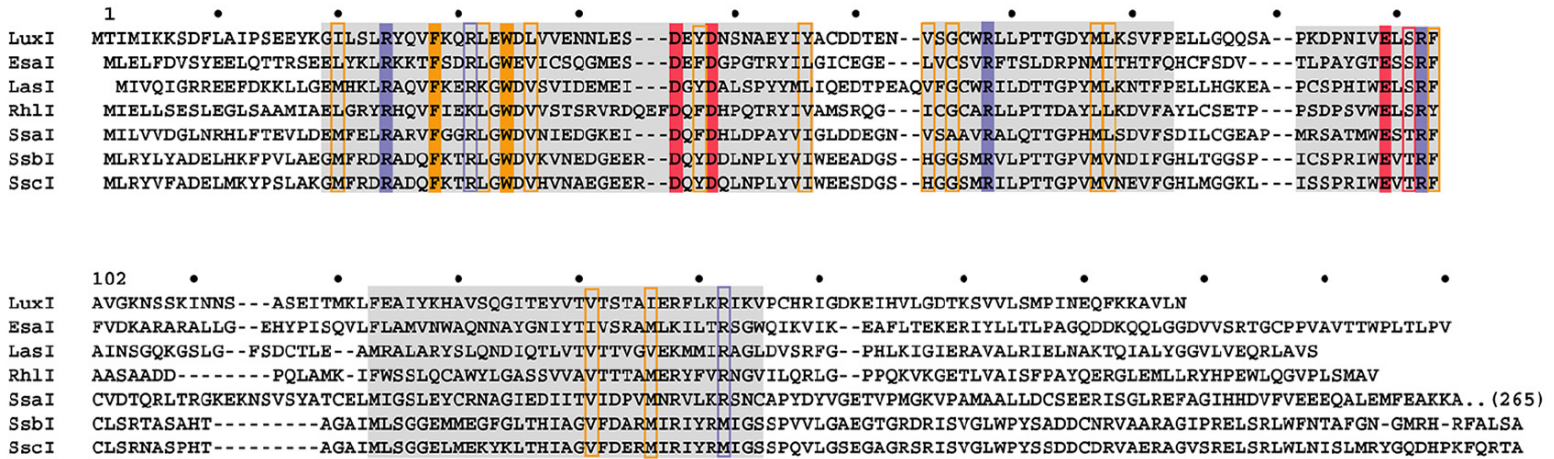

**Figure S3.** Sequence alignment of selected AHL synthases. The grey shaded regions are the most conserved sequence blocks within the AHL synthase family. Residues are colored red to indicate acidic or hydrophilic, blue for basic, and orange for other. Shaded residues are absolutely conserved and the boxed residues are the most similar regions within the family.

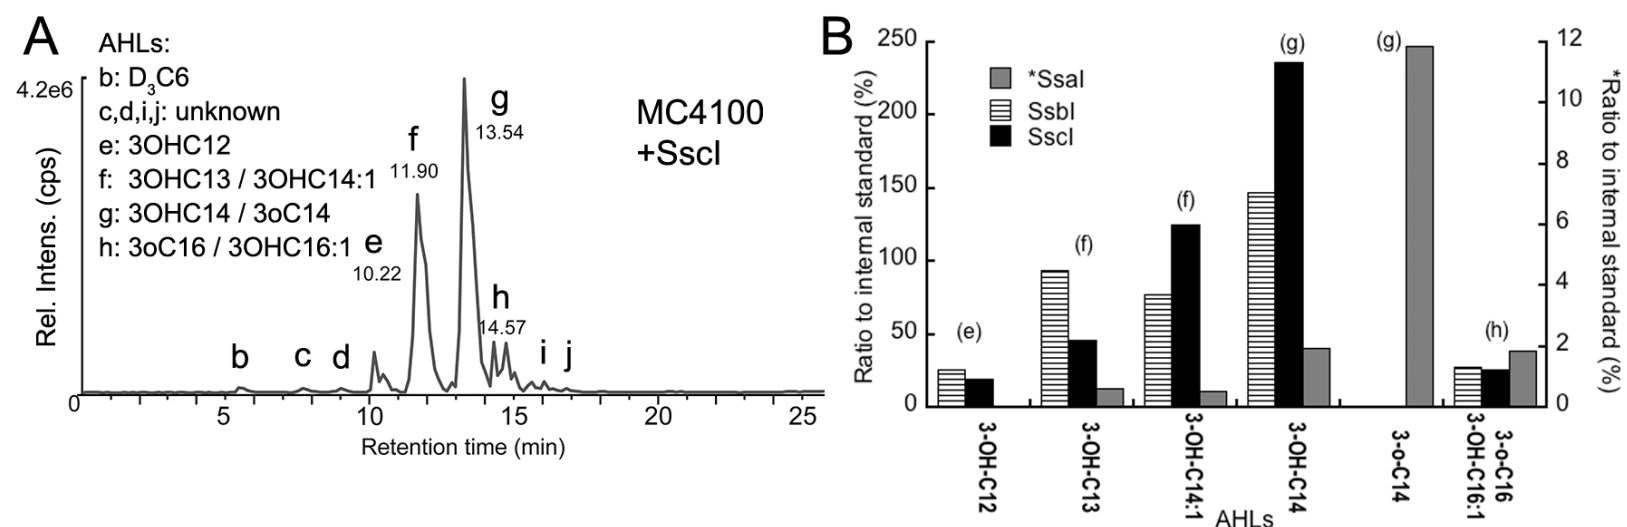

**Figure S4. Mass spectrometric analysis of plasmid-expressed Sscl-directed AHLs from *E. coli*.** Cultures of *E. coli* MC4100 expressing plasmid-borne *sscl* were extracted and subjected to reverse-phase chromatographic separation prior to tandem MS analysis using the precursor ion-scanning mode (transitions were monitored for precursor  $[M + H]^+ \rightarrow m/z 102$ ) for (A) MC4100 + Sscl. The peaks in the chromatograms are labeled with lettering and the AHLs are noted. (B) The relative amounts of the known AHLs in *E. coli* MC4100 derivatives harboring  $P_{lac}$  expression plasmids with Ssal, Ssbl, and Sscl are shown in bar graphs, with the peak label above each set of bars. The plot shows the ratio of the area of the transition for each AHL to  $m/z 102$  to the same transition for the internal standard D3-C6-HSL. The Ssbl/Sscl y axis is on the left, and the Ssal y axis is on the right.

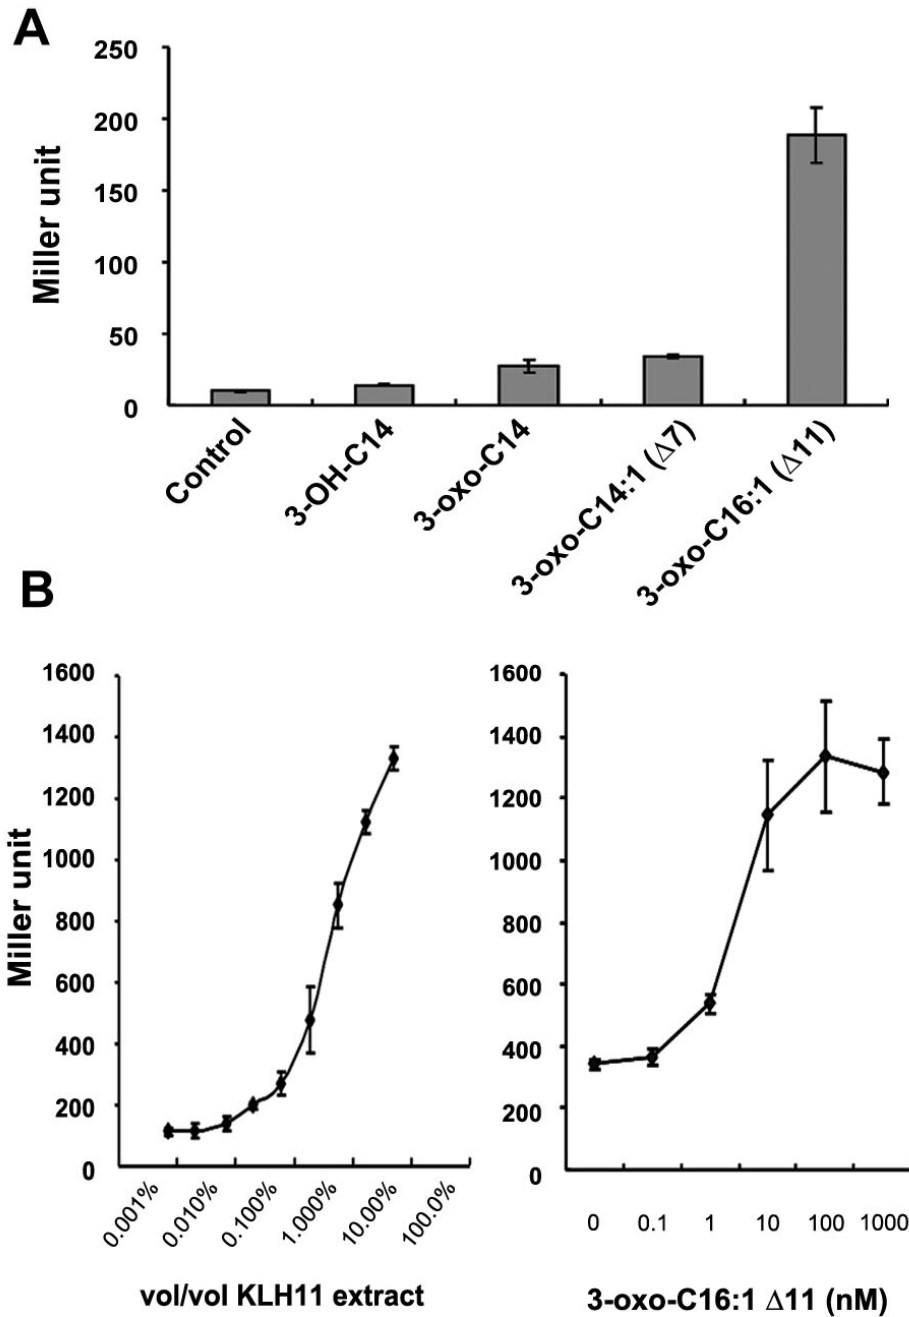

**Figure S5.** Activation of *ssaI* in response to synthetic AHLs (A) Activation of *ssaI-lacZ* fusion with synthetic long chain AHLs. KLH11 *ssaI*- carrying the integrated *ssaI-lacZ* fusion. The final concentration of 3-OH-C14 used was 20  $\mu$ M and the other 3 AHLs were 2  $\mu$ M (B) Dose responsive activation of *ssaI-lacZ* by SsaR ( $P_{lac}$ -*ssaR*) in *A. tumefaciens* NTL4 background. Different concentrations of the crude organic extract of KLH11 cultures (% v/v) and 3-oxo-C16:1  $\Delta 11$  (nM) were added at the time of culture inoculation. Miller Units are averages of assays performed in triplicate and error bars are standard deviations.

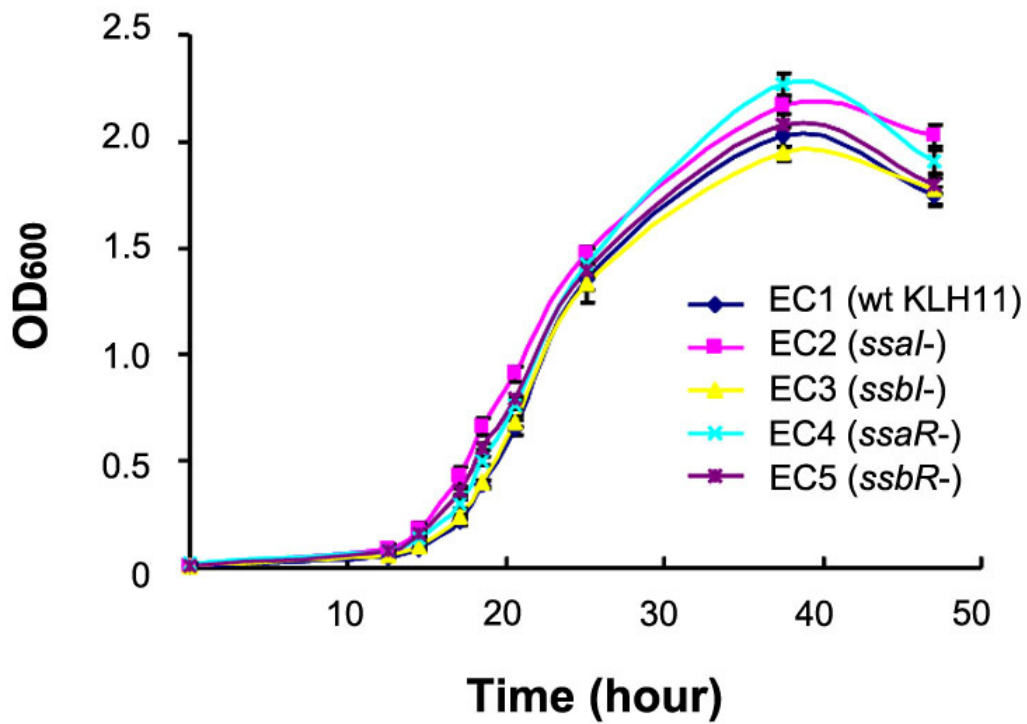

**Figure S6.** Growth curves of KLH11 and different QS mutants. Average OD<sub>600</sub> of 5 ml cultures in MB2216. Cultures were grown in triplicate.

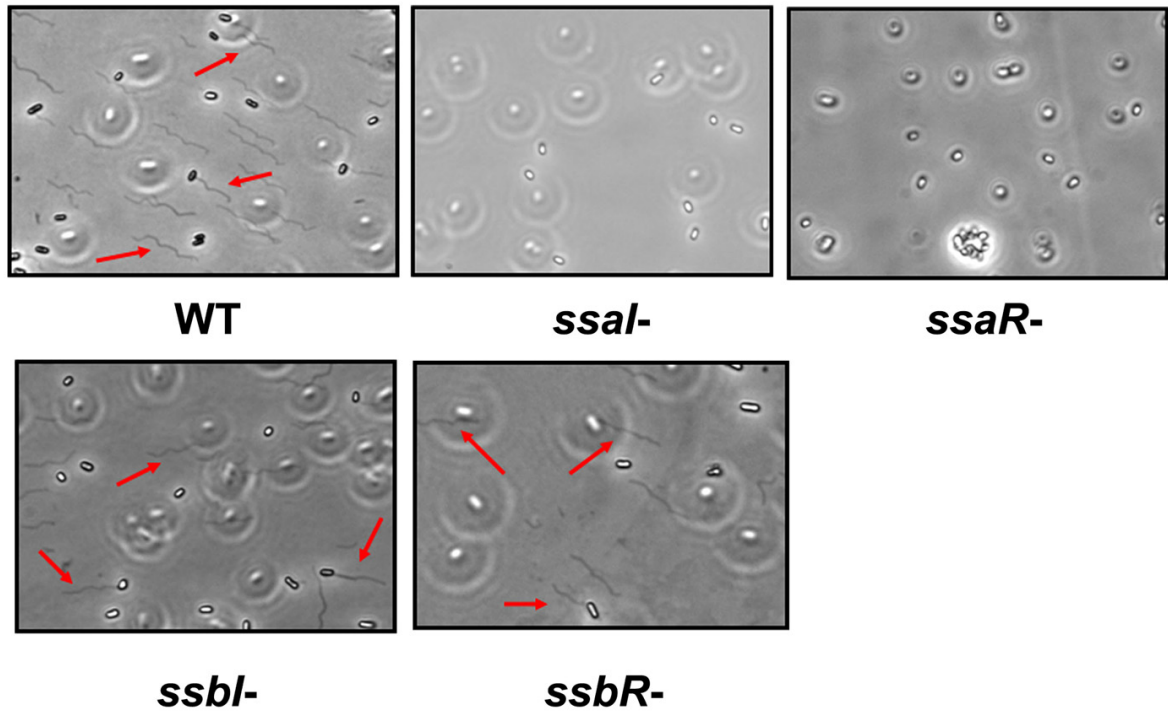

**Figure S7.** Flagellar staining of KLH11 quorum-sensing mutants. Stained cells from late stage cultures were viewed under phase contrast microscopy with 100X lens. Wild type (EC1), *ssaI*- (EC2), *ssbI*- (EC3), *ssaR*- (EC4), and *ssbR*- (EC5). Red arrows indicate stained flagella.

**Zan et al., Supplementary Figure 7**
